# Supplementary material for: Respiratory and Psychophysical Sequelae Among Patients With COVID-19 Four Months After Hospital Discharge
Source: PubMed Central journal article supplement (PMC7841464; doi:10.1001/jamanetworkopen.2020.36142), 2021-01-27
Supplement: jamanetwopen-e2036142-s001.pdf [file jamanetwopen-e2036142-s001.pdf]

## Supplemental Online Content

Bellan M, Soddu D, Balbo PE, et al. Respiratory and psychophysical sequelae among patients with COVID-19 four months after hospital discharge. *JAMA Netw Open*. 2021;4(1):e2036142. doi:10.1001/jamanetworkopen.2020.36142

**eTable 1.** Univariate Analysis for D<sub>LCO</sub> Less Than 80%

**eTable 2.** Univariate Analysis for D<sub>LCO</sub> Less Than 60%

**eTable 3.** Univariate Analysis for Functional Impairment

**eTable 4.** Univariate Analysis for Reduced Tolerance to Physical Activity

**eTable 5.** Univariate Analysis for PTS Symptoms

This supplemental material has been provided by the authors to give readers additional information about their work.

**eTable 1.** Univariate Analysis for D<sub>LCO</sub> Less Than 80%

|                                                                                                  | DLCO < 80% (n/y)                                                       | p      |
|--------------------------------------------------------------------------------------------------|------------------------------------------------------------------------|--------|
| Age, years                                                                                       | 60 [47-69] / 65 [51-72]                                                | 0.02   |
| Male gender                                                                                      | 79 (58.5) / 56 (41.5)                                                  | <0.001 |
| Obesity                                                                                          | 10 (9.4) / 11 (9.7)                                                    | 1.00   |
| T2DM                                                                                             | 12 (11.3) / 20 (17.7)                                                  | 0.25   |
| COPD                                                                                             | 4 (3.8) / 10 (8.8)                                                     | 0.17   |
| OSAS                                                                                             | 2 (1.9) / 2 (1.7)                                                      | 1.00   |
| Arterial hypertension                                                                            | 42 (39.6) / 47 (41.6)                                                  | 0.78   |
| Coronary Artery disease                                                                          | 9 (8.5) / 12 (10.6)                                                    | 0.65   |
| Atrial fibrillation                                                                              | 4 (3.8) / 11 (9.7)                                                     | 0.11   |
| Chronic Kidney Disease                                                                           | 2 (1.9) / 12 (10.6)                                                    | 0.01   |
| Smoking (active-former)                                                                          | 14 (13.2) – 27 (25.5) /<br>10 (8.8) – 42 (37.2)                        | 0.15   |
| Number of comorbidities (two or less – more than two)                                            | 24 (22.6) – 26 (24.5) /<br>29 (25.6) – 37 (32.3)                       | 0.23   |
| ICU admission                                                                                    | 8 (7.5) / 20 (17.7)                                                    | 0.03   |
| Modality of oxygen delivery (nasalcannula or Venturi mask – Non invasive ventilation-intubation) | 45 (42.4) – 18 (17.0) – 6 (5.7) /<br>45 (39.8) – 28 (24.8) – 15 (13.3) | 0.04   |

**eTable 2.** Univariate Analysis for D<sub>LCO</sub> Less Than 60%

|                                                                                                  | DLCO<60% (n/y)                                                          | p      |
|--------------------------------------------------------------------------------------------------|-------------------------------------------------------------------------|--------|
| Age                                                                                              | 61 [49-69] / 63.5 [54-75]                                               | 0.11   |
| Male gender                                                                                      | 118 (63.8) / 17 (50.0)                                                  | 0.18   |
| Obesity                                                                                          | 17 (9.2) / 4 (11.8)                                                     | 0.75   |
| T2DM                                                                                             | 24 (13.0) / 8 (23.5)                                                    | 0.12   |
| COPD                                                                                             | 8 (4.3) / 6 (17.6)                                                      | 0.01   |
| OSAS                                                                                             | 3 (1.6) / 1 (2.9)                                                       | 0.49   |
| Arterial hypertension                                                                            | 74 (40.0) / 15 (44.1)                                                   | 0.71   |
| Coronary Artery disease                                                                          | 16 (8.6) / 5 (14.7)                                                     | 0.34   |
| Atrial fibrillation                                                                              | 12 (6.5) / 3 (8.8)                                                      | 0.71   |
| Chronic Kidney Disease                                                                           | 9 (4.9) / 5 (14.7)                                                      | 0.05   |
| Smoking (active-former)                                                                          | 22 (11.9) - 54 (29.2) /<br>2 (5.9) – 15 (44.1)                          | 0.18   |
| Number of comorbidities (two or less – more than two)                                            | 45 (24.3) – 49 (26.5) /<br>8 (23.5) – 14 (41.2)                         | 0.19   |
| ICU admission                                                                                    | 15 (8.1) / 13 (38.2)                                                    | <0.001 |
| Modality of oxygen delivery (nasalcannula or Venturi mask – Non invasive ventilation-intubation) | 77 (41.6) – 37 (20.0) – 12 (6.5) /<br>13 (38.2) – 9 (26.5) – 9 (26.5.9) | <0.001 |

**eTable 3.** Univariate Analysis for Functional Impairment

|                                                                                                  | Functional impairment (n/y)                                            | p     |
|--------------------------------------------------------------------------------------------------|------------------------------------------------------------------------|-------|
| Age                                                                                              | 60 [47-69] / 65 [53-73]                                                | 0.01  |
| Male gender                                                                                      | 73 (66.4) / 69 (53.9)                                                  | 0.06  |
| Obesity                                                                                          | 5 (4.5) / 20 (15.6)                                                    | 0.005 |
| T2DM                                                                                             | 12 (10.9) / 24 (18.8)                                                  | 0.10  |
| COPD                                                                                             | 1 (0.9) / 13 (10.1)                                                    | 0.002 |
| OSAS                                                                                             | 1 (0.9) / 4 (3.13)                                                     | 0.38  |
| Arterial hypertension                                                                            | 41 (37.3) / 57 (44.5)                                                  | 0.29  |
| Coronary Artery disease                                                                          | 7 (6.4) / 15 (11.7)                                                    | 0.18  |
| Atrial fibrillation                                                                              | 5 (4.6) / 12 (9.4)                                                     | 0.21  |
| Chronic Kidney Disease                                                                           | 1 (0.9) / 14 (10.9)                                                    | 0.001 |
| Smoking (active-former)                                                                          | 12 (10.9) – 35 (31.8) /<br>13 (10.2) – 39 (30.5)                       | 0.95  |
| Number of comorbidities (two or less – more than two)                                            | 21 (19.1) – 20 (18.2) /<br>37 (28.9) – 48 (37.5)                       | 0.001 |
| ICU admission                                                                                    | 9 (8.2) / 19 (14.8)                                                    | 0.16  |
| Modality of oxygen delivery (nasalcannula or Venturi mask – Non invasive ventilation-intubation) | 53 (48.2) – 17 (15.5) – 7 (6.4) /<br>49 (38.3) – 32 (25.0) – 14 (10.9) | 0.12  |
| DLCO                                                                                             | 83 [75-93] / 73 [58-84]                                                | 0.001 |

**eTable 4.** Univariate Analysis for Reduced Tolerance to Physical Activity

|                                                                                                  | Functional impairment (n/y)                                           | p    |
|--------------------------------------------------------------------------------------------------|-----------------------------------------------------------------------|------|
| Age                                                                                              | 63 [52-72] / 56 [47-66]                                               | 0.01 |
| Male gender                                                                                      | 110 (58.0) / 32 (64.0)                                                | 0.52 |
| Obesity                                                                                          | 19 (10.1) / 6 (12.0)                                                  | 0.79 |
| T2DM                                                                                             | 30 (16.0) / 6 (12.0)                                                  | 0.66 |
| COPD                                                                                             | 11 (5.9) / 3 (6.0)                                                    | 1.00 |
| OSAS                                                                                             | 3 (1.6) / 2 (4.0)                                                     | 0.28 |
| Arterial hypertension                                                                            | 81 (43.1) / 17 (34.0)                                                 | 0.26 |
| Coronary Artery disease                                                                          | 19 (10.1) / 3 (6.0)                                                   | 0.58 |
| Atrial fibrillation                                                                              | 14 (7.4) / 3 (6.0)                                                    | 1.00 |
| Chronic Kidney Disease                                                                           | 10 (5.3) / 5 (10.0)                                                   | 0.32 |
| Smoking (active-former)                                                                          | 23 (12.2) – 56 (29.8) /<br>2 (4.0) – 18 (36.0)                        | 0.22 |
| Number of comorbidities (two or less – more than two)                                            | 50 (26.6) – 54 (28.7) /<br>8 (16.0) – 14 (28.0)                       | 0.23 |
| ICU admission                                                                                    | 17 (9.0) / 11 (22.0)                                                  | 0.02 |
| Modality of oxygen delivery (nasalcannula or Venturi mask – Non invasive ventilation-intubation) | 82 (43.6) – 40 (21.3) – 13 (6.9) /<br>20 (40.0) – 9 (18.0) – 8 (16.0) | 0.25 |
| DLCO                                                                                             | 80 [70-89] / 73 [58-84]                                               | 0.04 |

**eTable 5.** Univariate Analysis for PTS Symptoms

|                                                                                                  | PTS symptoms (n/y)                                                   | p     |
|--------------------------------------------------------------------------------------------------|----------------------------------------------------------------------|-------|
| Age                                                                                              | 62 [50-71] / 61 [54-70]                                              | 0.88  |
| Male gender                                                                                      | 114 (57.9) / 28 (68.3)                                               | 0.20  |
| Obesity                                                                                          | 21 (10.7) / 4 (9.8)                                                  | 1.00  |
| T2DM                                                                                             | 30 (15.2) / 6 (14.7)                                                 | 1.00  |
| COPD                                                                                             | 13 (6.6) / 1 (2.4)                                                   | 0.47  |
| OSAS                                                                                             | 4 (2.0) / 1 (2.4)                                                    | 1.00  |
| Arterial hypertension                                                                            | 79 (40.1) / 19 (46.3)                                                | 0.49  |
| Coronary Artery disease                                                                          | 18 (9.1) / 4 (9.8)                                                   | 1.00  |
| Atrial fibrillation                                                                              | 15 (7.6) / 2 (4.9)                                                   | 0.75  |
| Chronic Kidney Disease                                                                           | 9 (4.6) / 6 (14.6)                                                   | 0.003 |
| Smoking (active-former)                                                                          | 21 (10.7) – 60 (30.5) /<br>4 (9.8) – 14 (34.1)                       | 0.89  |
| Number of comorbidities (two or less – more than two)                                            | 46 (23.3) – 58 (29.4) /<br>12 (29.3) – 10 (24.4)                     | 0.67  |
| ICU admission                                                                                    | 23 (11.7) / 5 (12.2)                                                 | 1.00  |
| Modality of oxygen delivery (nasalcannula or Venturi mask – Non invasive ventilation-intubation) | 81 (41.1) – 46 (23.3) – 16 (8.1) /<br>21 (51.2) – 3 (7.3) – 5 (12.2) | 0.13  |
| DLCO                                                                                             | 80 [69-90] / 75 [67-83]                                              | 0.13  |
| Dyspnea at presentation                                                                          | 105 (53.3) / 24 (58.5)                                               | 0.60  |
| Residual dyspnea                                                                                 | 8 (4.0) / 5 (12.2)                                                   | 0.05  |
